# Supplementary material for: A Retrotransposon Insertion in the 5′ Regulatory Domain of Ptf1a Results in Ectopic Gene Expression and Multiple Congenital Defects in Danforth's Short Tail Mouse
Source: PubMed Central journal article supplement (PMC3578747; doi:10.1371/journal.pgen.1003206), 2013-02-21
Supplement: pgen.1003206.s003.pdf [file pgen.1003206.s003.pdf]

**Supplementary Table 1.** Sequence of the ETn insertion at the *Sd* locus. The wildtype flanking mouse sequence is indicated in red. The target site duplication is shown in blue. The RepBase alignments are shown below the table. The LTRs are indicated in bold (bp 60-908, 7739-8585). The segment aligning to ETnERV3 - ERV2 Endogenous Retrovirus is shown in green (bp 915-6301). The segment aligning to an internal portion of ERV2 Endogenous Retrovirus (bp 6302-7738) is shown in purple. The transposon sequence was aligned with Repbase reference data. (<http://www.girinst.org/repbase/index.html>)

| From | To   | Rebase Sequence | From | To   | Sim    | Pos/Mm:Ts | Score |
|------|------|-----------------|------|------|--------|-----------|-------|
| 60   | 908  | RLTR13A         | 4    | 857  | 0.9301 | 1.4062    | 6024  |
| 915  | 6301 | ETnERV3         | 186  | 5797 | 0.9629 | 1.3828    | 42993 |
| 6302 | 7738 | ERV2_1A-I_MM    | 1    | 1435 | 0.9798 | 1.3333    | 13065 |
| 7739 | 8585 | RLTR13A         | 6    | 857  | 0.9299 | 1.4062    | 6008  |

GCACAGACTGTGGTCCACTGTCTCATTGCCACTTTGGCTAATCCCTTTCACAGGGTGCCACAGACAATCTGGG  
TCCCTGGTCTGTGAAGAACGGGATTTCTTAGGCAGATGGACAAAAGATTCCGGATGAAAATGACAGACAGATCA  
CACGAGAAATGTGTTGAATCTGAATGTATTGTTCTGGTTGAGCTTCAGACTTATATAACAACGAATTATCAGA  
GGATACAAATCACAAAAGACAAGATACACTGAAATTCACCAGTTACAGCAGAAAGGAATTTACAGGGACTAA  
TTAAATGTTTACATTAGGGATAACAAGCCCTGCCTAGGATCAGCCTAATGCCAGGCAAGAATTTACACTTTAA  
GGTTAAAAGCATCAGGGGGTTGTTAACTCTTGACAGGCCTTAAGAGTAATGTGCTATCACAGAGCTCTAAATT  
CTTAGGTCTAATAAAACTTATCTTGTCTGGAGAGTTTCCCCTTATCAGGGTAGTATATCAACTTATACTTGACA  
TGGAAGTAGCCTGTAGTAAAAGATTTCTATCTCAGTGAGACTTTTAGTCTCTATCTGTAAACAGCTGAGTAAA  
ATGGCAAGTGCTTAATTGTTTACTGAATGGGTTAAGCTCCTTGCTGCTATCTGGAATCTAAGAACACTGGAAA  
AAGGCTTTAGCTATGTTAGAATAACAATCTTAAAAGGCATTTACTATAAGGTAATACTATATAGAGTGCACGTG  
GATCTATACTAGACTAATGTGGGAATGGAAAATTAATTTTATGGTTTATATAGATTAGGGAGATAATGCC  
AGGCCCCCGGAAGGGAGTTTCTTGAAACTCTTTGCTTCATGAACCAGCTTCCAGCTTTCGCTTTGTCAAGCT  
GACTCCACCAGAGTCCCTGGCATTCCACCCTTTTTTTTTTAATAAATGATAATTTATCTTTATTTCTCAGCCGAAGT  
TCCAGGATGTCCCGCTTCGTCGTAGCTACAGATCTCAGGAGCACTCTAAAGATGAGTGGAAACACAATGATTACTAAT  
AAAGTAATGCCAAAATAATAACAAGTAGGATAATATATTGAACCCAATCCAGAGGGTTAATGCACTTAAGTTGTT  
CTTTAAATCTCTAGTCAATTCATCAATGTTCCAAGTGTCCAGATGGCTTTTACTAATATCTGAAATTTTTAACTTTAA  
CTGTTCTAAATCATGAGAAATATCAGTATCTTTCCATATACCCTGTAATGAGTTTTTGTCTTTTCTAATCAGTGGT  
TGTAAGGTAAAGGAGTGACATAAATGTATAGAAAAGAAGCATGACATTTAGTAGCTAACCTGGTCTTGATATTAGCA  
ATATCTTGTCTATTGTCAGCAGACTTCTTTTAGGGCGTTAACCTTGTCTCCAATTTTTTATCTATAAAAATACCAC  
TCTGACAAGGCTACAGAGATATTCTTATGCATGTCATTAACAAAATGAGCAGTATGCAGTTGTTGACTAAGGCTGT  
GGTGGATAACGTAAAGGAAGTTAAAATAGCAATTAAGCAGTAATTTCCAGGATCAAAGCTGCTACAAATCTCTTAG  
GTCTAATAAGTTCTTTTAGTCTTTTAAAGCTTGCAATCCCGAATCTCAAATAAGGATCATTTTTTAACTCTACAG  
GCAGTAAAACATATCCAGGTCTCTTAAGCAAATCATAATAGCAGATTCCTTGTCTAAATTAGGTTCTACACAATTA  
GTTAATTGACAGGAATTACAATGTATATAAAAAGACTTGTTAAGATTGGTGATCTTAACTCTTAAAATTATCTAACA  
ATAAGCATACAGGTAAGGTACACAAGCTTTTACAGCTATAGGGGAGTTGGCCTGAATGGCCAAAAACAGTCTCTGAT  
GAAATCTTGTCTAATACTCTGTAGCAGTCTTCTACCTCACGAGTCAGCTGTTTTAGTTGTCTCCAAGTTGACACTAG  
GTCTGCTCTCCTTGTGTAGTCCATGGCGGAGATAGGAAGAGTTTCTTTATTTTGTCTGTGAGTGACTGATTTTTTTT  
TCCTCTGTGCACTCAATACAGCTTCTGGTCACCCTGTCAGGGCACTCAGGAACTCACAGGTCAGCCTGTACATGA  
ATCATTTTTGGGAGCTAGCACGCTCTTGTAGCATTCTGTGAAAAAACAGAAATATTGCCCCCTTTTCCCCATATTAAG  
TATCTGAACAGGATCATACCATGTGTCAATAAGTGGATCCCTTTATCTCATGAGTATGTCTGATTGTAGGGTGCCATA  
GACACTTAGAGAGATTTTTGACATCTAAATTTTTAAAAGATATAGATTTAAAGTTCCACAGTACTGTTTTCTGGGA  
ATAATAAAAATCTCAGTAACATGGATAACATTAATTTGTTGATAAAACATCTCAAATGCTTGGCTATAATAGCCAGT  
TTTAATTGATTTGGAACACCAAGTAAAAAATCAACATAGGCAACTATACTTTTAGTTGCTATTTTTTATTAGAGCAG  
TTGTAAGTAGAAAAGATTAAGGATCAATAGTCACATGTGCATGATTTATTTTTGTAAAATTAAGGATCTAT  
TTGTAATAATTGATTAAGTATACGTCCTCAAGAATTAATACCAATGTGTGTAACAGGTAGAAAAGTGGGACACTGAG  
ATCAAATCTTTACAATATGACATGTACATTAATTAATTTATTTATTTATTTTAAATACCAAATATTATCTCA  
AGCATTACTATTTTGTGATGTAAGAATGAGATTATATGGCATTATTTTTTTTTATAAGATCTATAATTTACCTG

GGATAGAAATCTAGCGTGGCATTGCCTTAAGAGGTTTTATCAGGCATTCTTTAACATTTTAAAACACTATCTACAGC  
ACATAATTTAATTATCTGTGCTAAAGTCGGCAGAACTCAAAAAGAATAAACATGTGATCCAATTTACATATATTTTT  
CTTTCCATAGAAAGTTGTTTTTAAATACAGTAAATGGGATGCATGTATGTATGAATTTACAAAAGTATGTATAGTA  
AGCAATTAGCTTATTTTTAAGATGAATATTAATTTTTATTTAAAATGATGGTATGCAATAGGTCAAATATCAATATTT  
TGTAATAACTAATAGCTGTTTGAAAAAAGAATTTTTAATTTCTAATTAGTACCACAGCAGCCTTATATATAATAGG  
ATGTTAAAACCTTTGAGGTGAAGAAAGATGATTTTTACATTAATGTTTTTTCTTGTCAAAAAATAGCTGTGGACACAT  
TTAATAACAATAACTAGAATATGTAGCTAATATTTGATTACCATCAATTACAATCGATATCAATATATATAGAAGT  
TTTTCTACTTTCTGTTAAAGCCTTTTTAGTTCTCACCAGTTAACTTGAACCTTACTTGATACCACTTAACAAAGGCT  
TAGGTTTTCTTGTTGGAATTTAAGGTGAGGTCTTAGTCAATTAACATCTCTTGGAAGCTTTTTGAAAATAAAAATTT  
TGAAGTAAATTTGTACCAATTTTTAATATAACTAAAACCTAGATATTAAGAAAAGACATTGCCTCTGAATCTTAT  
GAAGCAACAACCTATTTCCAGAACTTTAAACTTCTCTTTAGAGACATTAGTTAATAAAAATACTTTCCACTTAGGAAA  
CAATATATACTGAAAGATTTAAACTATTTTGCTTCTTGATTGAAGCCTGGACAATGAAAATTTCTTACATAATATA  
AGACTATATTAGCCATACTTAGGGGTAAAAACCTTTAATGGTCACCAGTTCCTAGAAAGTAAACTCTTTATAAATGG  
AAAAATAGACTTTTTAAATCTATAATAATTTTACATGAAGTAGGCAAGTTATTTTGTAATGCCTTTATAAGTTTTAT  
AGCCTGATTGACCTTTTATAAATCTTGAATTTAGACTTAATCATGAACAACACTTGGGTAGATCTGAAAAGAAAAAA  
TGTTGTTTAGCTAAAAGAAATTTCTCCCTGAAGGCAGGGAGGGTGAAGTTTCAAGAACTTTTTTAGGCGCAGTCTGTA  
AAACGCAAGAAACTTTGCACAAGCTTCTCTGAGGCTGCTTTAAGTTTTGTATTAACCCAAATGTATATATTTTTTAAAT  
TTGAGCATCTTGCCCTCTGCAATGAGGACAGATTCTAAAGGAGCAATTTAACTGTTTGTCCATGCCTCTGATTTTGG  
ACACTCTTTCTTAAGATGACTTATACCTTAAACATTTTCTTTTATGACCTTTTATGGTCTGCAATGCCGCAACCATA  
GTCAAATTTGATTGTGTGAGGGTCTAATTTTTGTACAAAGATGAATATATCTAGTTAATTTTACTTTGTTTTGTATAG  
CTGAATGTCCCAAGTGAGCAGCATTAGCACTCTTATAAGTTGATTATTCTAGTAATAATCTTAAAGTATGGGTGAGTT  
AAAAGTCTTAAGCTTTTGATTAAACTGCAAAGTCAAGTGGGACACTGGCAATTTTAAACCAGAATTTTAAAGTT  
TTTGTTGCAATATTAGAATATATCTATAACTTTTTGATAAGTAAGACCAATTTTAAACAATTTATTTCTCCTTAAAT  
CAATACTAAAAACATCACTACTACGTTACAAAATTTGGCTGTTAATTCATTAATGTATGACAGTTAATGTTTCATT  
AAAGAGACATTATCTTTAAAGATAAGAATTTCAATAAATGTTATCTCAATTTAGAAGTATCTTTAGAGGACTAGTTC  
TCTGGGCTGATTTATGCCAGGTGCTTTTGTGTTGAAAATGACTCTATCTTTGAGTTACTACTTTTAAAGTTAACTTTGTA  
ACTAGTGTACATCTTTTTAATTATACCCAAATAACTTATAAACAATTTCTCTATGACCAAGACATGTTAGATCATAT  
TTATACCTTTAAGACCAATCAAAAACCAATGAAGTGGCTACATGAATCTTATAAATTTAGATCAATTAAGAGTGT  
TACCTTGTAAGATAAAAAAGCAATTTGTTATTTGCTAAACACAATGATCACAAACTTGCAGAGAAAGTTTLAGGAAA  
AAACAACATCAGCTTATTTGCCTTAGAACTAAGAGGTTGCAGATTTCTTTTAAAAACAGTTTCTAGCAGGGCC  
TCTCTTGCACTGCTTATTATGGCTATAGTGAAGGCTTCTTCTCAGCCTCTTTGTGCAAACTGAGAGTGAATCAGC  
AGGTAAAGTTTTAACCATTATTTTTGTTTTATTTTTTCAACATGAAACATAAAAACAGTCATTGAGACAACGACACAA  
TCATTGAGACAATGAAACAAAAGAGATATACATGAATTTGACATTTAGACAATACATATAGGGGTAAAGAATTTCTCC  
TGTAGGGGCCAGAGAGAATGAAACAGGGCGTCCCCGATTTCTCTCTGTCCCTGGGAGAATTTCTAAAATCTATTTTCT  
TTTTATCCCTTCTTTCTTTTCTGCTTGTAAAGAGACAGGTTGTCAAATCAAGATTAATAATCCAAAATTTTCTAACAGC  
TCTGGCAAGCATCCAACTTCTAATTTATTTAATCTGAGGGCAAATTTTTGAGAAAACACACAATCTCTATACACTAA  
AATGTCTCAAATAGCCTAAAAGTTTACCATGCTGAATCTTTTTGAGCCATCATCAGTCCACACTTAGTCATATATTT  
TATAGTCACCTGCAAAAATGCTATTTTCTGCAACCAACAAAATACCATTTATGGAATGAATTATGTATGTTTTAG  
GAGATTACTTAACTTTCAATAGAGCCTTTTCTACGGATTTTLAGCACAATGTAGGATTGGGAAAATGTAAATAAGGT  
AACAGTAAGAAGTGACCTATATTTGACTTTTAAAGTCTCTTTTTATACTTTGACCATAATTTAACCATAACTTTTAAAT  
TTAGCCTAAAGTATCAGAATTTACAACCTGAAGTTTTTCTTATAACTGGAGCTGTGTCTTATAATGAGCTCCACAGTT  
TCTGAACGGGGCCAAGAGACTGCCCTTTAGTCTTTCGCCCTTACCTGCTTCTTAGTGAGCAGAGTCCCATCCTTATGG  
GACTTTGATTTACATTCACTTCTCCAGTGTGTGCACAACACTGGGAGGGACCCAAAGGAATGCTCTTTTTGTCTCCT  
GAGAGATTTTTACAATCTTTTCTCAGGTGCCCGGTTTCTTGCAACCGAAACATGTAATTTCCACACGTAGCGCCGAAT  
TTTTTCCCTTCTTGTGCTGGCGTAAGCTAATTTCTGCATTACAGCCAGTGAGGCATCTACACATGCTTTAATATAA  
TCTTGTAGGGAGCCTGTCTTACGAATTTGGTCTGATCAGGTCTTGACACAAGGTAAGCTTTTCCCAAGCCAATTTGT  
TTCATTAGTATATCAGTACCTTCCGAGGGAGGAAGCATCCTGGAACTGCCTCTTCCAATCTAGCTACAAAACCTTCA  
TAAGATTCATCATGCTTTTGTCTAATTTCTGAAAGGACTGTGGATTTAGCCCCAGGTACAGGTAAACTCCGCCAGCTA  
GATATAGCTATCTGATTTATTTCTCCAACACTGCCTTAGGAATATTCAGTTGCGCTGCTGGTCTAGCATAGTCTTTT  
TGCCCAAGAAGCATAGGGACTGTGGGTCTAGCTCCATTTCTTGATGAAGATCTTTCTGAGCTAACTTTCTGGCCCTT  
TCTTCATATTTCTGTTCTCCAGAGAATGAAATCTCCCGGAGCAAGAGTAGCTTTGCGGGTTTGGTACCAATCATAAGGG  
GTCAGCCACTGACTAGCTACTGCATCCAGGACCTGTAAGTATATGGTGCAGTAGGGCCCAGCGTTTTTACTGCTGAC  
TGTAATTCCTAAGAGTTTTTAAACGACAAAGGTTCCATTGTGGCTCACTCCCTTCTTACAGATTACCTGGCAAGTG  
AGTGTAAGTCTCCTTGCCTTTTTGCCTCTGCCACAGCAGCATCAAAGCCTACCGGTGGCAAAGTCTACGTGGCTTT  
GGCACTGGTCTGCGGGCGGCTGGTGTATAATTAAGACTCCTCCTCACTGCTATCTGTGTGCTTACTAAAACGATCC

TTTCTTCCCTTAATTACACACTTTGCCATTCCCTTAGTCCTTTCCATTTCATCATCATTTTTCACTGTCAGTGATCTCTG  
ATTCACTTTTTTCTAGCTTTATCCCTTTTTTTCTTGAACAATAGGATTTCTTTTTACCTGTATTGGGTTTCACTTTCT  
GATCATCAGAGAGCTCTGAAGGAGCTTCTCTGCAAGGAATTCTAGGTCTGTTTTCTCAGTCAATAAATCCCTCATCT  
GTTGCCACAATATAAAAAGCACTGTCAGGAACATTCTGGATAAATTTTCTCGTGAAACTTCTCATATCCTTTCCTA  
CTCGCTCCAATCTTCTAGTGTCAAGCTTCCCTCTCTGGAAACCAGGGACTGATTTTTTGCACGAAATCATAAAAT  
CTTGAAAGATTTATCTGAGATTTTTAGGCCTTTCCAGACAGCATGTGTTTAAACACTGACAGGAACAATTTTTTCC  
CTTTTGATTCTGATTGCCCCATGATAAATACTTACCCGTCTTTATAACGAACACTCCAGTCCGCCTGCCTGCAGCGCA  
GTCCACGGGGTCCATCTTTGCCTGAGAAAATAAAGAATAGAAAGAAAAAAGGAAAGAAAAGAAAAGACTAATC  
TGCCAGTTGTCCCTGTTTGAAGGCGCCAAGTCCACAGACAATCTGGGTCCCTGGTCTGTGAAGAACGGGATTT  
CTTAGGCAGATGGACAAAGATTCCGGATGAAAATGACAGACAGATCACACGAGAAATGTGTTGAATCTGAATG  
TATTGTTCTGGTTGAGCTTCAGACTTATATAACAACGAATTATCAGAGGATACAAATCACAAAAGACAAGAT  
ACACTGAAATTCACCAGTTACAGCAGAAAAGGAATTTACAGGGACTAATTAATGTTTACATTAGGGATAACAA  
GCCCTGCCTAGGATCAGCCTAATGCCAGGCAAGAATTTACACTTTAAGGTTAAAAGCATCAGGGGGTTGTAA  
CTTTGACAGGCCTTAAGAGTAATGTGCTATCACAGAGCTCTAAATTTAGGTCTAATAAAAATTTATCTTGTC  
TGGAGAGTTTCCCCTTATCAGGGTAGTATATCAACTTATACTTGACATGGAAGTAGCCTGTAGTAAAAGATTT  
CTATCTCAGTGAGACTTTTAGTCTCTATCTGTAACAGCTGAGTAAAAATGGCAAGTGCTTAATGTTTACTGA  
ATGGGTAAAGCTCCTTGCTGCTATCTGGAATCTAAGAACACTGGAAAAAGGCTTTAGCTATGTTAGAATACAA  
TCTTAAAAGGCATTTACTATAAGGTAATACTATATAGAGTGCACGTGGATCTATACACTAGACTAATGTGGGA  
ATGGAAAAATTAATTTTATGGTTTATATAGATTAGGGAGATAATGCCAGGCCCCCGGAAGGGAGTTTCTTG  
AAACTCTTTGCTTCATGAACCAGCTTCCAGCTTTGCTTTGTCAAGCTGACTCCACCAGAGTCCCTGGCAACAG  
GGATGACTTCTGTGACCCAAAATTC AAGCACAATTC ACTAGCTGTA.
